# Supplementary material for: Fluoride Content of Ready-to-Eat Infant Foods and Drinks in Australia
Source: MDPI journal article supplement (doi:10.3390/ijerph192114087), 2022-10-28
Supplement: s1 [file s1]

## Supplementary Material

**Table S1.** Summary of studies on fluoride concentration in infant formulas.

| Reference                    | Country        | Sample Size | Fluoride content ( $\mu\text{g F/g}$ and $\mu\text{g F/mL}$ or L) |                                       |
|------------------------------|----------------|-------------|-------------------------------------------------------------------|---------------------------------------|
|                              |                |             | Range                                                             | Mean                                  |
| This work                    | Australia      | 45          | 0.014-1.1 (distilled water)                                       | 0.24                                  |
| Maguire et al. (2011)        | United Kingdom | 147         | 0.01–0.03                                                         | 0.02                                  |
| Kaophun <i>et al.</i> (2018) | Thailand       | 17          | 0.24-0.30                                                         | 0.31                                  |
| Nohno <i>et al.</i> (2011)   | Japan          | 22          | 0.039 - 0.13 (distilled water)                                    | 0.09 (distilled water)                |
|                              |                |             | 0.078 - 0.26 (0.13 $\mu\text{g F/ mL}$ water)                     | 0.18 (0.13 $\mu\text{g F/ mL}$ water) |
| Clifford (2009)              | Australia      | 33          | 0.24–0.92                                                         | 0.49                                  |
| Nagata <i>et al.</i> (2016)  | Brazil         | 15          | 0.04-1.2                                                          | 0.22                                  |
| Cressey (2010)               | New Zealand    | 19          | 0.024-0.20                                                        | 0.069                                 |
| Mohd <i>et al.</i> (2020)    | Malaysia       | 29          | 0.009 to 0.20 (deionised water)                                   | 0.045                                 |
| Mahvi (2012)                 | Iran           | 12          | 1.0-2.2                                                           | 1.7                                   |

F – fluoride, g – Grams,  $\mu\text{g}$  – Microgram, L – Litre, mL – Millilitre.

**Table S2.** Summary of studies on fluoride content of infant formulas based on manufacturer-specified age group.

| Reference                    | Country   | Specified Age    | Fluoride content ( $\mu\text{g F/g}$ and $\mu\text{g F/mL}$ ) |                                                                 |
|------------------------------|-----------|------------------|---------------------------------------------------------------|-----------------------------------------------------------------|
|                              |           |                  | Mean                                                          | Range                                                           |
| This study                   | Australia | From Birth       | 0.24                                                          | 0.013-1.2                                                       |
|                              |           | >6 months        | 0.28                                                          | 0.014-0.92                                                      |
|                              |           | >12 months       | 0.29                                                          | 0.010-0.80                                                      |
|                              |           | $\geq 16$ months | 0.34                                                          | 0.040-0.84                                                      |
| Nohno <i>et al.</i> (2011)   | Japan     | From Birth       | 0.013 (distilled water)<br>0.026 (fluoridated water)          | 0.039–0.098 (distilled water)<br>0.078–0.20 (fluoridated water) |
|                              |           | From 6 months    | 0.011 (distilled water)<br>0.021 (fluoridated water)          | 0.087–0.092 (distilled water)<br>0.17–0.18 (fluoridated water)  |
|                              |           | From 12 months   | 0.012 (distilled water)<br>0.023 (fluoridated water)          | 0.11–0.13 (distilled water)<br>0.21–0.26 (fluoridated water)    |
| Maguire <i>et al.</i> (2011) | United    | From Birth       | 0.059                                                         | 0.010–0.25                                                      |
|                              | Kingdom   | From 4 months    | 0.11                                                          | 0.020–0.50                                                      |
|                              |           | From 6 months    | 0.14                                                          | 0.10–0.51                                                       |
|                              |           | 10 months        | 0.18                                                          | 0.06–1.2                                                        |

F – fluoride, g – Grams,  $\mu\text{g}$  – Microgram, L – Litre, mL – Millilitre.

**Table S3.** Summary of studies for the fluoride concentration in RTE foods and drinks.

| Reference                        | Fluoride content ranges ( $\mu\text{g F/g}$ and $\mu\text{g F/mL}$ ) |            |            |            |           |            |           |                                                        |                           |                                |
|----------------------------------|----------------------------------------------------------------------|------------|------------|------------|-----------|------------|-----------|--------------------------------------------------------|---------------------------|--------------------------------|
|                                  | Country                                                              | Juices     | Milk       | Vegetables | Cereals   | Fruits     | Desserts  | Meats                                                  | Fish                      | Chicken                        |
| This study                       | Australia                                                            | 0.004-1.2  | 0.001-0.56 | 0.002-2.7  | 0.001-1.8 | 0.001-0.87 | 0.004-1.3 | 0.003-2.818 (beef + vegetables, and lamb + vegetables) | 0.004-0.79 (fish and veg) | 0.001-2.3 (chicken vegetables) |
| Maguire <i>et al.</i> (2011)     | United Kingdom                                                       | 0.05–0.15  | 0.01–0.03  | 0.04–0.31  | –         | 0.02–0.19  | 0.03–0.38 | 0.04–1.20 (lamb, beef, pork)                           | 0.11–0.23                 | 0.07–0.27 chicken and turkey   |
| Tomori <i>et al.</i> (2004)      | Japan                                                                | 0.14–0.18  | –          | 0.04–0.56  | 0.06–0.44 | –          | –         | 0.02–0.18 (meat and fish)                              | –                         | –                              |
| Buzalaf <i>et al.</i> (2004)     | Brazil                                                               | 0.01–0.30  | –          | –          | 0.2–7.8   | –          | –         | –                                                      | –                         | –                              |
| Opydo-Szymaczek and Opydo (2010) | Poland                                                               | 0.01- 0.29 | –          | –          | –         | –          | –         | –                                                      | –                         | –                              |

F – fluoride, g – Grams,  $\mu\text{g}$  – Microgram, L – Litre, mL – Millilitre.
